# Supplementary material
Source: publisher site journal article supplement (https://www.dovepress.com/article/250829)
Supplement: Supplementary file 1 [file get_supplementary_file.php]

**Tissue Biomarkers**

*Genomic Tissue Biomarkers*

This is a list of tissue-based biomarkers from 25 papers that have been investigated by researchers using genomic techniques to identify patterns that could potentially differentiate BPH and PCa.

| **Biomarkers** | **BPH (n)** | **PCa (n)** | **Method** | **Significance** | **Reference** |
| --- | --- | --- | --- | --- | --- |
| Androgen Receptor (AR)↑, Activator Of Transcription And Developmental Regulator (AUTS2)↑, Cyclin-Dependent Kinase 5 Regulatory Subunit 1 (CDK5R1)↓, Crystallin Alpha B (CRYAB)↑, Forkhead Box A2 (FOXA2)↑, Potassium Calcium-Activated Channel Subfamily M Alpha 1 (KCNMA1), Membrane Metalloendopeptidase (MME)↑, SCEL↑, SDPR↑, Activated Leukocyte Cell Adhesion Molecule (ALCAM)↑, Claudin 7 (CLDN7)↑, Distal-Less Homeobox 1 (DLX1)↑, Prostate Cancer Antigen 3 (PCA3)↑, Ras Related Dexamethasone Induced 1 (RASD1)↑ | 15 | 26 | RT‐PCR | Yes | 1 |
|  |  |  |  |  |  |
| Kallikrein Related Peptidase 4 (KLK4)↑ | 59 | 60 | qPCR | Yes | 2 |
|  |  |  |  |  |  |
| PRCAT17.3↑, PRCAT38↑ | 30 | 30 | qPCR | Yes | 3 |
|  |  |  |  |  |  |
| Receptor Activator of NF-κB (RANK)↓ | 71 | 60 | RT-PCR | Yes | 4 |
|  |  |  |  |  |  |
| Retinoic Acid Receptor Beta (RARB)↑, Glutathione S-Transferase Pi 1 (GSTP1)↑, Ras Association Domain Family Member 1 (RASSF1)↑ | 17 | 149 | MS-PCR | Yes | 5 |
|  |  |  |  |  |  |
| Cluster miR-17-92↑ | 16 | 29 | RT-PCR | Yes | 6 |
|  |  |  |  |  |  |
| AR-V4↓, AR-V1↑, AR-V7↑ | 30 | 25 | qPCR | Yes | 7 |
|  |  |  |  |  |  |
| Pim-1 Proto-Oncogene (PIM-1)↑, Hexokinase 2 (HK2) mRNA↑ | 37 | 23 | qPCR | Yes | 8 |
|  |  |  |  |  |  |
| Ribonuclease Kappa (RNase κ)↓ | 101 | 111 | qPCR | Yes | 9 |
|  |  |  |  |  |  |
| miR-301a↑ | 12 | 28 | RT-PCR | Yes | 10 |
|  |  |  |  |  |  |
| Kallikrein Related Peptidase 5 (KLK5)↓ | 53 | 50 | qPCR | Yes | 11 |
|  |  |  |  |  |  |
| Scavenger Receptor Class B type I (SR-BI)↑ | 19 | 51 | qPCR | Yes | 12 |
|  |  |  |  |  |  |
| Kallikrein Related Peptidase 15 (KLK15)↑ | 72 | 78 | qPCR | Yes | 13 |
|  |  |  |  |  |  |
| Kallikrein Related Peptidase 15 (KLK15)↑ | 52 | 52 | RT-PCR, Spectrophotometry | Yes | 14 |
|  |  |  |  |  |  |
| Chymase 1 (CMA1)↑, Matrix Metallopeptidase 3 (MMP3)↑, Matrix Metallopeptidase 7 (MMP7)↑, Matrix Metallopeptidase 14 (MMP14)↑, Tissue Inhibitor Of Metalloproteinases 1 (TIMP1)↑, Tissue Inhibitor Of Metalloproteinases 2 (TIMP2)↑ | 10 | 12 | qPCR | Yes | 15 |
|  |  |  |  |  |  |
| Ankyrin Repeat Domain 34B (ANKRD34B)↑, NIMA Related Kinase 5 (NEK5)↑, Potassium Voltage-Gated Channel Modifier Subfamily G Member 3 (KCNG3)↑, Protein Tyrosine Phosphatase Receptor Type T (PTPRT)↑ | 26 | 4 | RNA-Sequencing, qPCR | Yes | 16 |
|  |  |  |  |  |  |
| Homeobox C6 (HOXC6)↑, Alpha-Methylacyl-CoA Racemase (AMACR)↑, Prostate Cancer Antigen 3 (PCA3)↑ | 19 | 20 | Microarray, qPCR, RT-PCR | Yes | 17 |
|  |  |  |  |  |  |
| miR-187-3p↓, miR-183-5p↑, miR-32-5p↑ and  miR-141-5p↑ | 14 | 34 | qPCR | Yes | 18 |
|  |  |  |  |  |  |
| miR-20a | 58 | 53 | qPCR | No | 19 |
|  |  |  |  |  |  |
| Prostate Cancer Antigen 3 (PCA3)↑, Transmembrane Serine Protease 2 (TMPRSS2): ERG↑ | 48 | 48 | qPCR | Yes | 20 |
|  |  |  |  |  |  |
| Osteopontin splicing isoforms↑ | 30 | 40 | qPCR | Yes | 21 |
|  |  |  |  |  |  |
| RNA, Ro60-Associated Y1 (RNY1)↓, RNY3↓, RNY4↓, RNY5↓ | 28 | 56 | qPCR | Yes | 22 |
|  |  |  |  |  |  |
| Cell Division Cycle 6 (CDC6)↑ | 66 | 121 | qPCR | Yes | 23 |
|  |  |  |  |  |  |
| S100 Calcium Binding Protein A8 (S100A8)↓, S100 Calcium Binding Protein A8 (S100A9)↓ | 90 | 132 | qPCR | Yes | 24 |
|  |  |  |  |  |  |
| 5'-tRNA-Asp-GUC-half↑, 3'-tRNA-Asp-GUC-half↑ | 25 | 58 | RT-PCR | Yes | 25 |

miRNA = microRNA
qPCR = Quantitative Polymerase Chain Reaction RT-PCT = Reverse Transcription Polymerase Chain Reaction MS-PCR = Methylation-Specific Polymerase Chain Reaction
↓/↑ = Expression levels in PCa group compared to that of BPH group

Supplementary Table 1: Tissue-based biomarkers derived from genomic techniques

*Proteomic Tissue Biomarkers*

This is a list of tissue-based biomarkers from 21 papers that have been investigated by researchers using proteomic techniques to identify patterns that could potentially differentiate BPH and PCa.

| **Biomarkers** | **BPH (n)** | **PCa (n)** | **Method** | **Significant** | **Reference** |
| --- | --- | --- | --- | --- | --- |
| Nerve Growth Factor (NGF)↓, Glial Cell-Derived Neurotrophic Factor (GDNF)↑, Matrix Metallopeptidase 9 (MMP-9)↑ | 30 | 121 | IHC | Yes | 26 |
|  |  |  |  |  |  |
| Beclin-1 (BCL1)↓, Beclin-2 (BCL2)↑ | 30 | 106 | IHC | Yes | 27 |
|  |  |  |  |  |  |
| Prostate Specific Membrane Antigen (PSMA)↓ | 29 | 33 | IHC | Yes | 28 |
|  |  |  |  |  |  |
| Telomere Repeat Binding Factor 1 (TRF1)↑ | 50 | 50 | IHC | Yes | 29 |
|  |  |  |  |  |  |
| Annexin II↓ | 40 | 85 | IHC | Yes | 30 |
|  |  |  |  |  |  |
| Placenta-Specific 1 (PLAC1)↑ | 27 | 154 | IHC | Yes | 31 |
|  |  |  |  |  |  |
| Membrane-Associated Guanylate Kinase (MAGI-2)↑ | 31 | 139 | IHC | Yes | 32 |
|  |  |  |  |  |  |
| Androgen Receptor Isoforms: AR-V4↓, AR-V1↑, AR-V7↑ | 6 | 6 | IHC | Yes | 7 |
|  |  |  |  |  |  |
| Androgen Receptor (AR) | 10 | 10 | IHC | No | 33 |
|  |  |  |  |  |  |
| Arginase 1 (Arg1)↑ | 15 | 36 | IHC | Yes | 34 |
|  |  |  |  |  |  |
| Scavenger Receptor Class B type I (SR-BI)↑ | 19 | 51 | IHC | Yes | 12 |
|  |  |  |  |  |  |
| Interleukin-6 (IL-6)↓ | 25 | 82 | IHC | Yes | 35 |
|  |  |  |  |  |  |
| Caveolin-1↑ | 25 | 20 | IHC | Yes | 36 |
|  |  |  |  |  |  |
| Matrix Metallopeptidase 14 (MMP14)↑, Tissue Inhibitor Of Metalloproteinases 1 (TIMP1)↑, Tissue Inhibitor Of Metalloproteinases 2 (TIMP2)↑ | 10 | 12 | IHC | Yes | 15 |
|  |  |  |  |  |  |
| Vitronectin↓ | 41 | 66 | IHC | Yes | 37 |
|  |  |  |  |  |  |
| Caspase-8↑ | 35 | 112 | IHC | Yes | 38 |
|  |  |  |  |  |  |
| Transforming Growth Factor Beta (TGF-B)↑, Transforming Growth Factor Beta Receptor-1 (TGF-RI)↑, Transforming Growth Factor Beta Receptor-2 (TGF-RII)↑ | 35 | 86 | IHC | Yes | 39 |
| S100 Calcium Binding Protein P (S100P)↓, Basigin (CD147)↑, Octamer-Binding Transcription Factor 4 (OCT4)↑ | 40 | 54 | IHC | Yes | 40 |
|  |  |  |  |  |  |
| Connexin 43↓ | 60 | 243 | IHC | Yes | 41 |
|  |  |  |  |  |  |
| Cell Division Cycle 6 (CDC6)↑ | 66 | 121 | IHC | Yes | 23 |
|  |  |  |  |  |  |
| S100 Calcium Binding Protein A8 (S100A8)↓, S100 Calcium Binding Protein A9 (S100A9)↓ | 90 | 132 | IHC | Yes | 24 |

IHC = Immunohistochemistry
↓/↑ = Expression levels in PCa group compared to that of BPH group

Supplementary Table 2: Tissue-based biomarkers derived from proteomic techniques

*Seminal Fluid Biomarkers*

This is a list of seminal fluid-based biomarkers from 3 papers that have been investigated by researchers using various techniques to identify patterns that could potentially differentiate BPH and PCa.

| **Biomarkers** | **BPH (n)** | **PCa (n)** | **Method** | **Significance** | **Reference** |
| --- | --- | --- | --- | --- | --- |
| N-acetyllactosaminide beta-1, 3-N-acetylglucosaminyltransferase↑,  Prostatic Acid Phosphatase↑, stabilin-2↑, GTPase IMAP family member 6↑, Semenogelin-1↓ and -2↓ | 21 | 70 | CE-MS | Yes | 42 |
|  |  |  |  |  |  |
| Prostate Specific Antigen (PSA)  Prostatic Acid Phosphatase (PAP) Glycoforms | 59 | 92 | TAC, HPLC, MS | Yes | 43 |
|  |  |  |  |  |  |
| Seminal Cell-Free DNA↑ | 18 | 25 | scfDNA Quantification | Yes | 44 |
|  |  |  |  |  |  |

CE-MS = Capillary electrophoresis–mass spectrometry
TAC = Thiophilic Adsorption Chromatography
HPLC = High Performance Liquid Chromatography
MS = Mass Spectrometry
scfDNA = Seminal Cell-Free DNA
↓/↑ = Expression levels in PCa group compared to that of BPH group

Supplementary Table 3: Seminal Fluid Based Biomarkers

**Supplementary References**

1. Altintas DM, Allioli N, Decaussin M, et al. Differentially Expressed Androgen-Regulated Genes in Androgen-Sensitive Tissues Reveal Potential Biomarkers of Early Prostate Cancer. Migliaccio A, ed. *PLoS One*. 2013;8(6):e66278. doi:10.1371/journal.pone.0066278

2. Avgeris M, Stravodimos K, Scorilas A. Kallikrein-related peptidase 4 gene (KLK4) in prostate tumors: Quantitative expression analysis and evaluation of its clinical significance. *Prostate*. 2011;71(16):1780-1789. doi:10.1002/pros.21395

3. Bayat H, Narouie B, Ziaee S-AM, Mowla SJ. Two long non-coding RNAs, Prcat17.3 and Prcat38, could efficiently discriminate benign prostate hyperplasia from prostate cancer. *Prostate*. 2018;78(11):812-818. doi:10.1002/pros.23538

4. Christoph F, König F, Lebentrau S, et al. RANKL/RANK/OPG cytokine receptor system: mRNA expression pattern in BPH, primary and metastatic prostate cancer disease. *World J Urol*. 2018;36(2):187-192. doi:10.1007/s00345-017-2145-y

5. Daniunaite K, Jarmalaite S, Kalinauskaite N, et al. Prognostic Value of *RASSF1* Promoter Methylation in Prostate Cancer. *J Urol*. 2014;192(6):1849-1855. doi:10.1016/j.juro.2014.06.075

6. Feng S, Qian X, Li H, Zhang X. Combinations of elevated tissue miRNA‑17‑92 cluster expression and serum prostate‑specific antigen as potential diagnostic biomarkers for prostate cancer. *Oncol Lett*. 2017;14(6):6943-6949. doi:10.3892/ol.2017.7026

7. Hillebrand AC, Pizzolato LS, Neto BS, Branchini G, Brum IS. Androgen receptor isoforms expression in benign prostatic hyperplasia and primary prostate cancer. Saleem M, ed. *PLoS One*. 2018;13(7):e0200613. doi:10.1371/journal.pone.0200613

8. He H, Bi X, Zheng Z, et al. Real-time quantitative RT-PCR assessment of PIM-1 and hK2 mRNA expression in benign prostate hyperplasia and prostate cancer. *Med Oncol*. 2009;26(3):303-308. doi:10.1007/s12032-008-9120-9

9. Kladi-Skandali A, Mavridis K, Scorilas A, Sideris DC. Expressional profiling and clinical relevance of RNase κ in prostate cancer: a novel indicator of favorable progression-free survival. *J Cancer Res Clin Oncol*. 2018;144(10):2049-2057. doi:10.1007/s00432-018-2719-0

10. Kolluru V, Chandrasekaran B, Tyagi A, et al. miR-301a expression: Diagnostic and prognostic marker for prostate cancer. *Urol Oncol Semin Orig Investig*. 2018;36(11):503.e9-503.e15. doi:10.1016/j.urolonc.2018.07.014

11. Korbakis D, Gregorakis AK, Scorilas A, et al. Quantitative analysis of human kallikrein 5 (KLK5) expression in prostate needle biopsies: an independent cancer biomarker. *Clin Chem*. 2009;55(5):904-913. doi:10.1373/clinchem.2008.103788

12. Li J, Ren S, Piao H-L, et al. Integration of lipidomics and transcriptomics unravels aberrant lipid metabolism and defines cholesteryl oleate as potential biomarker of prostate cancer. *Sci Rep*. 2016;6:20984. doi:10.1038/srep20984

13. Mavridis K, Avgeris M, Koutalellis G, Stravodimos K, Scorilas A. Expression analysis and study of the *KLK15* mRNA splice variants in prostate cancer and benign prostatic hyperplasia. *Cancer Sci*. 2010;101(3):693-699. doi:10.1111/j.1349-7006.2009.01450.x

14. Mavridis K, Stravodimos K, Scorilas A. Quantified *KLK* *15* Gene Expression Levels Discriminate Prostate Cancer From Benign Tumors and Constitute a Novel Independent Predictor of Disease Progression. *Prostate*. 2013;73(11):1191-1201. doi:10.1002/pros.22667

15. Neuhaus J, Schiffer E, Mannello F, et al. Protease Expression Levels in Prostate Cancer Tissue Can Explain Prostate Cancer-Associated Seminal Biomarkers—An Explorative Concept Study. *Int J Mol Sci*. 2017;18(5):976. doi:10.3390/ijms18050976

16. Nikitina AS, Sharova EI, Danilenko SA, et al. Novel RNA biomarkers of prostate cancer revealed by RNA-seq analysis of formalin-fixed samples obtained from Russian patients. *Oncotarget*. 2017;8(20):32990-33001. doi:10.18632/oncotarget.16518

17. Paziewska A, Dabrowska M, Goryca K, et al. DNA methylation status is more reliable than gene expression at detecting cancer in prostate biopsy. *Br J Cancer*. 2014;111(4):781-789. doi:10.1038/bjc.2014.337

18. Paziewska A, Mikula M, Dabrowska M, et al. Candidate diagnostic miRNAs that can detect cancer in prostate biopsy. *Prostate*. 2018;78(3):178-185. doi:10.1002/pros.23427

19. Pesta M, Klecka J, Kulda V, et al. Importance of miR-20a expression in prostate cancer tissue. *Anticancer Res*. 2010;30(9):3579-3583. http://www.ncbi.nlm.nih.gov/pubmed/20944140. Accessed March 19, 2019.

20. Robert G, Jannink S, Smit F, et al. Rational basis for the combination of PCA3 and TMPRSS2:ERG gene fusion for prostate cancer diagnosis. *Prostate*. 2013;73(2):113-120. doi:10.1002/pros.22546

21. Tilli TM, Thuler LC, Matos AR, et al. Expression analysis of osteopontin mRNA splice variants in prostate cancer and benign prostatic hyperplasia. *Exp Mol Pathol*. 2012;92(1):13-19. doi:10.1016/j.yexmp.2011.09.014

22. Tolkach Y, Niehoff E-M, Stahl AF, et al. YRNA expression in prostate cancer patients: diagnostic and prognostic implications. *World J Urol*. 2018;36(7):1073-1078. doi:10.1007/s00345-018-2250-6

23. Kim Y-H, Byun YJ, Kim WT, et al. CDC6 mRNA Expression Is Associated with the Aggressiveness of Prostate Cancer. *J Korean Med Sci*. 2018;33(47):e303. doi:10.3346/jkms.2018.33.e303

24. Yun SJ, Yan C, Jeong P, et al. Comparison of mRNA, Protein, and Urinary Nucleic Acid Levels of S100A8 and S100A9 between Prostate Cancer and BPH. *Ann Surg Oncol*. 2015;22(7):2439-2445. doi:10.1245/s10434-014-4194-4

25. Zhao C, Tolkach Y, Schmidt D, et al. tRNA-halves are prognostic biomarkers for patients with prostate cancer. *Urol Oncol Semin Orig Investig*. 2018;36(11):503.e1-503.e7. doi:10.1016/j.urolonc.2018.08.003

26. Baspinar S, Bircan S, Ciris M, Karahan N, Bozkurt KK. Expression of NGF, GDNF and MMP-9 in prostate carcinoma. *Pathol - Res Pract*. 2017;213(5):483-489. doi:10.1016/j.prp.2017.02.007

27. Baspinar S, Bircan S, Orhan H, Kapucuoglu N, Bozkurt KK. The relation of beclin 1 and bcl-2 expressions in high grade prostatic intraepithelial neoplasia and prostate adenocarcinoma: A tissue microarray study. *Pathol - Res Pract*. 2014;210(7):412-418. doi:10.1016/j.prp.2014.02.008

28. Ben Jemaa A, Bouraoui Y, Sallami S, Banasr A, Nouira Y, Oueslati R. PSA-PSMA profiles and their impact on sera PSA levels and angiogenic activity in hyperplasia and human prostate cancer. *Pathol Biol*. 2014;62(3):129-136. doi:10.1016/j.patbio.2014.02.012

29. Chen W, Wang Y, Li F, Lin W, Liang Y, Ma Z. Expression of Telomere Repeat Binding Factor 1 and TRF2 in Prostate Cancer and Correlation with Clinical Parameters. *Biomed Res Int*. 2017;2017:1-5. doi:10.1155/2017/9764752

30. Yang L, Yang L, Wang Y, Yuan J, Chen T, Cai X. Down-regulation of annexin II in prostate cancer is associated with Gleason score, recurrence, metastasis and poor prognosis. *Mol Med Rep*. 2010;3(5):781-787. doi:10.3892/mmr.2010.332

31. Ghods R, Ghahremani M-H, Madjd Z, et al. High placenta-specific 1/low prostate-specific antigen expression pattern in high-grade prostate adenocarcinoma. *Cancer Immunol Immunother*. 2014;63(12):1319-1327. doi:10.1007/s00262-014-1594-z

32. Goldstein J, Borowsky AD, Goyal R, et al. MAGI-2 in prostate cancer: an immunohistochemical study. *Hum Pathol*. 2016;52:83-91. doi:10.1016/j.humpath.2016.01.003

33. Husain I, Shukla S, Soni P, Husain N. Role of androgen receptor in prostatic neoplasia versus hyperplasia. *J Cancer Res Ther*. 2016;12(1):112. doi:10.4103/0973-1482.151429

34. Jang TJ, Kim SA, Kim MK. Increased number of arginase 1-positive cells in the stroma of carcinomas compared to precursor lesions and nonneoplastic tissues. *Pathol - Res Pract*. 2018;214(8):1179-1184. doi:10.1016/j.prp.2018.06.016

35. Miličević N, Mrčela M, Galić J, Marjanović K. Expression of proinflammatory cytokine interleukin-6 in tissue samples of human prostate obtained by needle biopsy. *Pathol - Res Pract*. 2015;211(11):865-870. doi:10.1016/j.prp.2015.08.008

36. Mohammed DA, Helal DS. Prognostic significance of epithelial/stromal caveolin‐1 expression in prostatic hyperplasia, high grade prostatic intraepithelial hyperplasia and prostatic carcinoma and its correlation with microvessel density. *J Egypt Natl Canc Inst*. 2017;29(1):25-31. doi:10.1016/j.jnci.2017.01.002

37. Niu Y, Zhang L, Bi X, Yuan S, Chen P. Evaluation of Vitronectin Expression in Prostate Cancer and the Clinical Significance of the Association of Vitronectin Expression with Prostate Specific Antigen in Detecting Prostate Cancer. *Urol J*. 2016;13(1):2527-2532. http://www.ncbi.nlm.nih.gov/pubmed/26945657. Accessed March 19, 2019.

38. Rodríguez-Berriguete G, Galvis L, Fraile B, et al. Immunoreactivity to caspase-3, caspase-7, caspase-8, and caspase-9 forms is frequently lost in human prostate tumors. *Hum Pathol*. 2012;43(2):229-237. doi:10.1016/j.humpath.2011.04.024

39. Torrealba N, Rodríguez-Berriguete G, Fraile B, et al. Expression of several cytokines in prostate cancer: Correlation with clinical variables of patients. Relationship with biochemical progression of the malignance. *Cytokine*. 2017;89:105-115. doi:10.1016/j.cyto.2016.08.008

40. Wang Q, Zhang JG, Wang W. Expression and significance of S100P, CD147, and OCT4 in different prostate cancer tissue TNM stages. *Genet Mol Res*. 2015;14(2):6844-6851. doi:10.4238/2015.June.18.27

41. Xu N, Chen H-J, Chen S-H, et al. Reduced Connexin 43 expression is associated with tumor malignant behaviors and biochemical recurrence-free survival of prostate cancer. *Oncotarget*. 2016;7(41):67476-67484. doi:10.18632/oncotarget.11231

42. Neuhaus J, Schiffer E, von Wilcke P, et al. Seminal Plasma as a Source of Prostate Cancer Peptide Biomarker Candidates for Detection of Indolent and Advanced Disease. Vlahou A, ed. *PLoS One*. 2013;8(6):e67514. doi:10.1371/journal.pone.0067514

43. White KY, Rodemich L, Nyalwidhe JO, et al. Glycomic characterization of prostate-specific antigen and prostatic acid phosphatase in prostate cancer and benign disease seminal plasma fluids. *J Proteome Res*. 2009;8(2):620-630. doi:10.1021/pr8007545

44. PONTI G, MACCAFERRI M, MICALI S, et al. Seminal Cell Free DNA Concentration Levels Discriminate Between Prostate Cancer and Benign Prostatic Hyperplasia. *Anticancer Res*. 2018;38(9):5121-5125. doi:10.21873/anticanres.12833
